1 **Mitochondrial PE potentiates respiratory enzymes to amplify**

2 **skeletal muscle aerobic capacity**

3

4 Timothy D. Heden,<sup>1,7,\*</sup> Jordan M. Johnson,<sup>1-5,\*</sup> Patrick J. Ferrara,<sup>1-5</sup> Hiroaki Eshima,<sup>2</sup> Anthony R.

5 P. Verkerke,<sup>1-5</sup> Edward J. Wentzler,<sup>1,3</sup> Piyarat Siripoksup,<sup>2,5</sup> Tara M. Narowski,<sup>1,3</sup> Chanel B.

6 Coleman,<sup>1,3</sup> Chien-Te Lin,<sup>1,6</sup> Terence E. Ryan,<sup>1,6,8</sup> Paul T. Reidy,<sup>2,5</sup> Lisandra E. de Castro Brás,<sup>6</sup>

7 Courtney M. Karner,<sup>9</sup> Charles F. Burant,<sup>10</sup> J. Alan Maschek,<sup>11</sup> James E. Cox,<sup>2,11,12</sup> Douglas G.

8 Mashek,<sup>7</sup> Gabrielle Kardon,<sup>13</sup> Sihem Boudina,<sup>2,4,17</sup> Tonya N. Zeczycki,<sup>1,14</sup> Jared Rutter,<sup>2,12</sup>

9 Saame R. Shaikh,<sup>1,14,15</sup> Jean E. Vance,<sup>16</sup> Micah J. Drummond,<sup>2,4,5,17</sup> P. Darrell Neuffer,<sup>1,3,6</sup>

10 Katsuhiko Funai<sup>1-6,17</sup>

11

12 <sup>1</sup>East Carolina Diabetes & Obesity Institute, East Carolina University, Greenville, NC.

13 <sup>2</sup>Diabetes & Metabolism Research Center, University of Utah, Salt Lake City, UT.

14 <sup>3</sup>Department of Kinesiology, East Carolina University, Greenville, NC.

15 <sup>4</sup>Department of Nutrition & Integrative Physiology, University of Utah, Salt Lake City, UT

16 <sup>5</sup>Department of Physical Therapy & Athletic Training, University of Utah, Salt Lake City, UT

17 <sup>6</sup>Department of Physiology, East Carolina University, Greenville, NC.

18 <sup>7</sup>Department of Biochemistry, Molecular Biology, & Biophysics, University of Minnesota,

19 Minneapolis, MN.

20 <sup>8</sup>Department of Applied Physiology & Kinesiology, University of Florida, Gainesville, FL.

21 <sup>9</sup>Department of Orthopaedic Surgery & Department of Cell Biology, Duke University School of

22 Medicine, Durham, NC.

23 <sup>10</sup>Michigan Regional Comprehensive Metabolomics Resource Core, University of Michigan, Ann

24 Arbor, MI.

25 <sup>11</sup>Metabolomics Core Research Facility, University of Utah, Salt Lake City, UT.

26 <sup>12</sup>Department of Biochemistry, University of Utah, Salt Lake City, UT.

27 <sup>13</sup>Department of Human Genetics, University of Utah, Salt Lake City, UT.

28 <sup>14</sup>Department of Biochemistry & Molecular Biology, East Carolina University, Greenville, NC.

29 <sup>15</sup>Department of Nutrition, University of North Carolina, Chapel Hill, NC.

30 <sup>16</sup>Department of Medicine, University of Alberta, Edmonton, Alberta, Canada.

31 <sup>17</sup>Molecular Medicine Program, University of Utah, Salt Lake City, UT.

32 \*These authors contributed equally.

33

34 Correspondence Author:

35 Katsuhiko Funai, Ph.D.,

36 Diabetes & Metabolism Research Center

37 15 N 2030 E, Salt Lake City, UT 84112

38 Phone: (801) 585-1781

39 Fax: (801) 585-0701

40 [kfunai@utah.edu](mailto:kfunai@utah.edu)

41 **Abstract**

42 Exercise capacity is a strong predictor of all-cause mortality. Skeletal muscle mitochondrial  
43 respiratory capacity, its biggest contributor, adapts robustly to changes in energy demands  
44 induced by contractile activity. While transcriptional regulation of mitochondrial enzymes has  
45 been extensively studied, there is limited information on how mitochondrial membrane lipids are  
46 regulated. Herein, we show that exercise training or muscle disuse alters mitochondrial  
47 membrane phospholipids including phosphatidylethanolamine (PE). Addition of PE promoted,  
48 whereas removal of PE diminished, mitochondrial respiratory capacity. Surprisingly, skeletal  
49 muscle-specific inhibition of mitochondrial-autonomous synthesis of PE caused a respiratory  
50 failure due to metabolic insults in the diaphragm muscle. While mitochondrial PE deficiency  
51 coincided with increased oxidative stress, neutralization of the latter did not rescue lethality.  
52 These findings highlight the previously underappreciated role of mitochondrial membrane  
53 phospholipids in dynamically controlling skeletal muscle energetics and function.

54

55

## 56 **Introduction**

57 Low aerobic capacity is a stronger risk factor for all-cause mortality compared to other common  
58 risk factors such as hypertension, type 2 diabetes, and smoking.<sup>1</sup> Skeletal muscle mitochondrial  
59 respiration is the largest contributor for whole-body aerobic capacity,<sup>2</sup> which in turn is influenced  
60 by mitochondrial density and activities of the electron transport system (ETS). Changes in  
61 physical activity robustly alters skeletal muscle mitochondrial content and maximal aerobic  
62 capacity.<sup>3,4</sup> Such proliferation or diminishment of mitochondrial biomass must coincide with  
63 synthesis or degradation of mitochondrial enzymes and structural lipids. While processes that  
64 regulate mitochondrial enzymes are well described,<sup>5,6</sup> it is unknown how composition of  
65 mitochondrial lipids change in response to these adaptations.

66

67 Lipids of the inner mitochondrial membrane (IMM) are largely phospholipids with only trace  
68 amounts of sphingolipids and cholesterol.<sup>7</sup> They consist of phosphatidylcholine (PC, 38-45%),  
69 phosphatidylethanolamine (PE, 32-39%), cardiolipin (CL, 14-23%), phosphatidylinositol (PI, 2-  
70 7%), phosphatidylserine (PS), phosphatidylglycerol (PG), and lyso-phosphatidylcholine (lyso-  
71 PC, all less than 3%).<sup>8</sup> These phospholipids not only give rise to the shape of IMM but are also  
72 essential for activities of the enzymes of ETS.<sup>8,9</sup> In particular, PE and CL are conical-shaped  
73 phospholipids that promote the formation of cristae where ETS enzymes reside. These non-  
74 bilayer lipids lessen torsional strain of the IMM by localizing into the negatively curved inner  
75 leaflet.<sup>10</sup> They also bind with high affinity to mitochondrial respiratory complexes and regulate  
76 their functions.<sup>8,11</sup> Human mutations that promote loss of mitochondrial PE or CL are detrimental  
77 to health.<sup>12-14</sup>

78

79 In this study, we set out to describe changes in skeletal muscle mitochondrial phospholipidome  
80 that occurs with exercise or disuse. Mitochondrial PE emerged as a key lipid signature that was  
81 induced by alterations in physical activity. We then pursued the cellular consequences of

82 changes in muscle mitochondrial PE per se in skeletal muscle-specific tamoxifen-inducible gain-  
83 or loss-of-function mouse models. Greater mitochondrial PE, in the absence of changes in the  
84 abundance of ETS enzymes, was sufficient to increase the capacity for oxidative  
85 phosphorylation. Loss of mitochondrial PE proved fatal due to metabolic and contractile failure  
86 in the diaphragm muscle.

87

## 88 **Results**

89 Endurance exercise training induces a robust proliferation of skeletal muscle mitochondria to  
90 increase aerobic capacity,<sup>3</sup> but it is unknown whether training coincides with qualitative changes  
91 in mitochondrial phospholipid composition.<sup>8</sup> C57BL6/J mice were subject to 5-wk of graded  
92 treadmill training which promoted skeletal muscle mitochondrial biogenesis (Supplement Figure  
93 1A). Phospholipid analyses of these mitochondria revealed a disproportionately greater increase  
94 in PE compared to other phospholipids (Figure 1A&B). High-capacity running (HCR) rats, which  
95 had been selectively bred for their intrinsic exercise capacity, demonstrate protection from a  
96 wide range of metabolic and cardiovascular diseases compared to low-capacity running (LCR)  
97 rats.<sup>15</sup> Skeletal muscle mitochondria from HCR rats contained more PE than did LCR  
98 (Supplement Figure 1B). These observations led us to examine the possibility that an increase  
99 in mitochondrial PE contributes to increased aerobic capacity in exercise-trained mice or HCR  
100 rats.

101

102 Mitochondrial PE is synthesized primarily by the enzyme phosphatidylserine decarboxylase  
103 (PSD) that resides in the IMM.<sup>16,17</sup> Skeletal muscle PSD expression was greater in exercise-  
104 trained mice compared to sedentary mice (Figure 1C) and in HCR rats compared to that in LCR  
105 rats.<sup>18</sup> Overexpression of PSD in murine C2C12 myotubes increased the maximal O<sub>2</sub>  
106 consumption rate (Supplement Figure 1C), suggesting that an increased amount of  
107 mitochondrial PE enhances respiratory capacity. To study the effects of increased mitochondrial

108 PE *in vivo*, we generated mice with tamoxifen-inducible skeletal-muscle specific overexpression  
109 of PSD (PSD-MKI) (Figure 1D). This strategy successfully yielded mice with skeletal muscle-  
110 specific PSD overexpression (Figure 1E) and elevated mitochondrial PE (Figure 1F). High-  
111 resolution respirometry/fluorometry experiments revealed that PSD overexpression increased  
112 the rates of O<sub>2</sub> consumption and ATP production (Figure 1G&H), effects that were not due to  
113 increased mitochondrial mass, abundance of ETS enzymes (Figure 1I, Supplement Figure 1D),  
114 or fiber-type (Figure 1J). However, the increase in respiratory capacity did not increase treadmill  
115 endurance performance (Figure 1K) or skeletal muscle force generating capacity *ex vivo* (Figure  
116 1L, Supplement Figure 1E&F). PSD-MKI and control mice also did not differ in body weight or  
117 composition, food intake, or energy expenditure (Supplement Figure 1G-K). Thus, an increase  
118 in muscle mitochondrial PE can increase oxidative capacity but not to an extent that influences  
119 endurance. An increase in muscle endurance likely requires concomitant improvements in  
120 contractile elements and substrate mobilization.

121  
122 Skeletal muscle disuse rapidly reduces mitochondrial mass and function. Reduced  
123 mitochondrial function precedes disuse-induced muscle atrophy<sup>19</sup> and might contribute to the  
124 mechanism for skeletal muscle loss.<sup>20</sup> We subjected C57BL6/J mice to a 2-wk hindlimb  
125 unloading<sup>21</sup> which promoted robust muscle loss (Figure 2A). Phospholipid analyses of skeletal  
126 muscle mitochondria revealed that disuse promotes an accelerated loss of PE (Figure 2B),  
127 concomitant with reduced PSD mRNA (Figure 2C). To model the loss of mitochondrial PE *in*  
128 *vitro*, we performed lentivirus-mediated knockdown of PSD in C2C12 myotubes (Supplement  
129 Figure 2A). Reduction in mitochondrial PE (Supplement Figure 2B) robustly reduced  
130 mitochondrial respiratory capacity (Supplement Figure 2C&D) in the absence of changes in ETS  
131 enzymes (Supplement Figure 2E&F), suggesting that lack of PE suppresses activities of  
132 membrane-bound ETS enzymes (Supplement Figure 2G&H). Since global knockout of PSD is  
133 embryonically lethal,<sup>22</sup> we generated mice with tamoxifen-inducible skeletal muscle-specific

134 knockout of PSD (PSD-MKO) (Figure 2D&E). Skeletal muscle mitochondria from PSD-MKO  
135 mice were selectively depleted in PE esterified with polyunsaturated fatty acids (Figure 2F&G,  
136 Supplement Figure 2I&J). Strikingly, tamoxifen-induced KO promoted a rapid weight loss  
137 (Figure 2H), kyphosis (Figure 2I), and ultimately death between 6 and 8-wk after tamoxifen  
138 injection (Figure 2J). The lethality of PSD knockout was likely induced by ventilatory failure in  
139 respiratory muscles, a common symptom in mitochondrial diseases,<sup>23</sup> as evidenced by reduced  
140 breathing rate and SpO<sub>2</sub> (Figure 2K&L). Cardiomyopathy, pulmonary edema, low bone density,  
141 hypophagia, or hypomobility did not explain the premature death in PSD-MKO mice  
142 (Supplement Figure 2K-S). Reduction in body weight was manifested in both lean and fat mass  
143 loss (Supplement Figure 2T) as well as in weights of individual muscles including diaphragm  
144 (Figure 2M, Supplement Figure 2U). The loss in muscle weights were explained by reduction in  
145 cross-sectional area of individual muscle fibers (Figure 2N, Supplement Figure 2V&W). The  
146 diaphragm displayed substantial fibrosis (Figure 2O) and loss of force-generating capacity  
147 (Figure 2P, Supplement Figure 2X&Y). Thus, acute loss of mitochondrial PE promotes a rapid  
148 loss of skeletal muscle mass and function that is reminiscent of atrophy found in disuse in limb  
149 muscles as well as that in respiratory muscles during mechanical ventilation.<sup>24</sup>

150  
151 As PSD generates PE for the IMM, the underlying cause of lethal myopathy in PSD-MKO mice  
152 is also likely due to changes to mitochondria. PSD deletion deformed mitochondria with less  
153 dense cristae (Figure 3A), similar to findings in PSD-depleted CHO cells<sup>25</sup> and global PSD  
154 knockout mice.<sup>22</sup> These changes occurred in the absence of alteration in abundance of proteins  
155 involved in mitochondrial fusion and fission (Supplement Figure 3A). High-resolution  
156 respirometry and fluorometry experiments revealed a robust reduction in the rates of O<sub>2</sub>  
157 consumption and ATP production in PSD-MKO muscles (Figure 3B&C, Supplement Figure  
158 3B&C), without changes in abundance of ETS enzymes (Figure 3D). PE molecules are bound to  
159 ETS complexes I, II, III, and IV, likely facilitating conformational changes and acting as an

160 allosteric activator.<sup>26-29</sup> Indeed, enzyme activity assays revealed that activities of ETS  
161 complexes I-IV, but not V, were lower in muscles from PSD-MKO mice than in control muscles  
162 (Figure 3E). Oxidative phosphorylation is also dependent upon assembly of respiratory  
163 supercomplexes,<sup>30,31</sup> and PE appears to be essential for this process.<sup>25</sup> Indeed, reduction in  
164 mitochondrial PE essentially eliminated the formation of respiratory supercomplexes (Figure  
165 3F). Together, these observations suggest that mitochondrial PE deficiency stagnates efficient  
166 electron transfers in the ETS. In turn, inefficiency in electron transfer is predicted to promote  
167 electron leakage that causes superoxide production.<sup>32,33</sup> Indeed, H<sub>2</sub>O<sub>2</sub> production was markedly  
168 higher in PSD-MKO muscles than in control muscles under various substrate conditions (Figure  
169 3G, Supplement Figure 3D-F). Elevated oxidative stress also increased reactive lipid aldehydes  
170 such as 4-hydroxynenal and malondeldehyde (Figure 3H&I),<sup>34</sup> oxidized glutathione (Figure 3J),  
171 and counter-oxidative response proteins (Supplement Figure 3G) in PSD-MKO muscles to a  
172 greater extent than in control muscles. As oxidative stress has been implicated in skeletal  
173 muscle atrophy,<sup>35,36</sup> we further tested the mechanistic link among mitochondrial PE deficiency,  
174 oxidative stress, and respiratory failure in PSD-MKO mice.

175

176 In skeletal muscle, excess superoxide dismutase converts superoxides to H<sub>2</sub>O<sub>2</sub>.<sup>37,38</sup> To  
177 neutralize H<sub>2</sub>O<sub>2</sub> produced in mitochondrial PE deficient mice, we crossed the PSD-MKO mice  
178 with mice that overexpressed mitochondrial-targeted catalase (mCAT) (Figure 4A, Supplement  
179 Figure 4A). This strategy yielded mice (mCATxPSD-MKO) with repressed skeletal muscle H<sub>2</sub>O<sub>2</sub>  
180 production (Figure 4B, Supplement Figure 4B). However, mCAT overexpression did not rescue  
181 the lethality of PSD-MKO mice (Figure 4C), nor did it ameliorate muscle atrophy (Figure 4D,  
182 Supplement Figure 4C), force generating capacity (Figure 4E, Supplement Figure 4D), or  
183 oxidative capacity (Figure 4F, Supplement Figure 4E). Thus, while mitochondrial PE deficiency  
184 increases oxidative stress, it is not directly responsible for the contractile and metabolic defects  
185 in the PSD-MKO mice. This finding was somewhat surprising since oxidative stress is predicted



186 to activate an array of downstream pathways, many of which overlap with defects observed in  
187 PSD-MKO mice.<sup>35,36</sup> To understand the biological processes in PSD-MKO mice that might  
188 explain their lethality, we performed deep-sequencing analyses on diaphragms from control,  
189 PSD-MKO, and mCATxPSD-MKO mice. Transcripts for 6,026 genes were differentially  
190 expressed between control and PSD-MKO diaphragms, and some of which were rescued with  
191 mCAT overexpression (Supplement Figure 4F). However, a large majority of differentially-  
192 expressed genes were not rescued with mCAT (Supplement Figure 4G), consistent with our  
193 observations that deficiency in mitochondrial PE triggers events independent of oxidative stress.  
194 Among the 68 pathways that were statistically significantly affected between control and PSD-  
195 MKO diaphragms, 45 of them remained altered in mCATxPSD-MKO diaphragms (Figure 4G).  
196 Of particular interest, PSD deletion activated pathways for proteasome and ubiquitin-mediated  
197 proteolysis, but not lysosome or apoptosis, suggesting that mitochondrial PE deficiency likely  
198 promotes muscle atrophy via proteasomal degradation (Figure 4H). Interestingly, PSD deletion  
199 also induced activation of transcriptional and translational pathways that were not reversed in  
200 mCATxPSD-MKO diaphragms. As expected, mCAT overexpression suppressed activation of  
201 antioxidant pathways including glutathione metabolism and peroxisomal genes.

202

## 203 **Discussion**

204 Phospholipid molecules are largely insoluble in the aqueous cytosol and their intracellular  
205 movements are relatively limited. Thus, the membrane phospholipid composition of different  
206 organelles is highly distinct, thereby creating a biophysical environment unique to each  
207 subcellular location. In mitochondria, the high concentration of PE not only promotes membrane  
208 curvature in the cristae, but is also essential for efficient electron transfer and oxidative  
209 phosphorylation.<sup>25,39,40</sup> Recent reports identified loss-of-function mutations in the human *PISD*  
210 gene (that encodes PSD enzyme) that promotes severe mitochondrial dysfunction and  
211 characterized by congenital cataracts, short stature, facial dysmorphism, platyspondyly, ataxia,

212 and/or intellectual disability.<sup>12,14</sup> Combined with data presented in the current manuscript, these  
213 findings indicate a critical role that mitochondrial PE plays in health and disease.

214

215 In skeletal muscle, inhibition of mitochondria-autonomous synthesis of PE via PSD causes  
216 robust skeletal muscle atrophy and ventilatory failure due to fibrosis and loss of contractility in  
217 the diaphragm muscle. The underlying cause appears to be due to a system failure of  
218 mitochondrial circuitry that is evident in reduced activities of complex I-IV, low supercomplex  
219 formation, and elevated electron leak (Figure 4I). We predict that these defects trigger  
220 proteosomal degradation pathways that promote muscle atrophy and weakness. In contrast,  
221 such a phenotype does not occur when PE synthesis via the CDP-ethanolamine pathway on the  
222 ER is inhibited in skeletal muscle,<sup>41,42</sup> suggesting that pools of PE made by PSD and CDP-  
223 ethanolamine pathway are functionally distinct. How select phospholipids (such as PC, PI and  
224 PA) are transported from ER to mitochondria, but PE is unable to do so is not understood.<sup>17,40</sup>  
225 Furthermore, it is known that PE generated by PSD is readily transported from mitochondria to  
226 ER.<sup>43</sup> Thus it remains possible that some of the defects in the PSD-MKO mice are due to a lack  
227 of PE exported from mitochondria.

228

229 In conclusion, our findings reveal that alteration in PE composition represents a key adaptive  
230 response to exercise or disuse in skeletal muscle mitochondria. Gain- or loss-of-function studies  
231 show that changes in mitochondrial PE modulates oxidative capacity independent of changes in  
232 abundance of ETS proteins. A deficiency of mitochondrial PE in the diaphragm muscle is  
233 detrimental to its metabolic and contractile function, leading to ventilatory failure and lethality.  
234 While these defects were associated with increased oxidative stress, its neutralization with  
235 mitochondrial-targeted catalase did not prevent any of the dysfunction induced by PSD  
236 deficiency. These findings also raise a possibility that reduced mitochondrial PE represents a  
237 mechanism by which disuse promotes the loss of muscle mass and function associated with

238 muscle atrophy. Changes in mitochondrial phospholipid composition appears to be an important  
239 regulatory mechanism by which physical activity modulates mitochondrial energetics in skeletal  
240 muscle.

241

242

243 **Materials and Methods**

244 *Rodent models*

245 PSD conditional knock-in (PSDcKI<sup>+/+</sup>) mice were generated by inserting myc-tagged mouse *Pisd*  
246 cDNA into a Rosa26 locus. *Pisd* cDNA was preceded by a CAG promoter and loxP-flanked stop  
247 codon for a tissue-specific ectopic expression of PSD. These mice were then crossed with HSA-  
248 MerCreMer mice (tamoxifen-inducible  $\alpha$ -human skeletal actin Cre, courtesy of Dr. Karyn Esser,  
249 University of Florida) to generate PSD-MKI (PSDcKI<sup>+/-</sup>, HSA-MerCreMer<sup>+/-</sup>) and control  
250 (PSDcKI<sup>+/-</sup>, No Cre) mice. Mouse embryonic stem (ES) cells that carried loxP sites flanking  
251 exons 4-8 of the mouse PSD gene were purchased from the European Conditional Mouse  
252 Mutagenesis Program (EUCOMM). The cells were microinjected into C57BL/6J blastocysts and  
253 transplanted in pseudopregnant females to produce PSD conditional knockout (PSDcKO<sup>+/+</sup>)  
254 mice. These mice were crossed with HSA-MerCreMer mice to generate PSD-MKO (PSDcKO<sup>+/+</sup>,  
255 HSA-MerCreMer<sup>+/-</sup>) and control (PSDcKO<sup>+/+</sup>, No Cre) mice. Mitochondrial catalase (mCAT)  
256 transgenic mice were purchased from the Jackson Laboratory (Stock No: 0161971) and crossed  
257 with PSD-MKO mice to generate the mCATxPSD-MKO (mCAT<sup>+/-</sup>, PSDcKO<sup>+/+</sup>, HSA-  
258 MerCreMer<sup>+/-</sup>), PSD-MKO, mCAT (mCAT<sup>+/-</sup>, PSDcKO<sup>+/+</sup>, No Cre), and control (PSDcKO<sup>+/+</sup>, no  
259 Cre) mice. Cre control mice (PSDcKO<sup>-/-</sup> or PSDcKI<sup>-/-</sup>, HSA-MerCreMer<sup>+/-</sup>) and tamoxifen-  
260 untreated control mice displayed no difference in phenotype to loxP control mice. All mice were  
261 bred onto C57BL/6J background and were born at normal Mendelian ratios. Both male and  
262 female mice were studied with no difference in phenotypes. HCR and LCR rats were maintained  
263 and studied at the University of Michigan. All animals were fasted 4 h prior to tissue collection.  
264 All protocols were approved by Institutional Animal Care and Use Committees at University of  
265 Utah, East Carolina University, and University of Michigan.

266

267 *Exercise training*

268 Male C57BL/6J mice were kept untrained (n = 5) or underwent treadmill training (5 d/wk, 12  
269 m/min, 2-6% incline, n = 8) for 5 weeks. The mice were then sacrificed and tissues were  
270 dissected ~40 h after the last exercise session.

271

#### 272 *Hindlimb unloading*

273 Male C57BL/6J mice underwent 2 weeks of hindlimb unloading (HU) or were ambulatory  
274 controls. The HU (2 mice/cage) were subjected to a modified unloading method based on the  
275 traditional Morey-Holton design for studying disuse atrophy in rodents.<sup>21</sup> Body weight and food  
276 intake were monitored every other day to ensure that mice did not experience excessive weight  
277 loss due to malnutrition or dehydration. At the end of day 14 of HU, mice were fasted for 4 h and  
278 anesthetized for tissue collection.

279

#### 280 *RNA quantification*

281 For qPCR experiments, mouse tissues or cells were lysed in 1 ml of Trizol (ThermoFisher) and  
282 RNA was isolated using standard techniques. The iScript<sup>TM</sup> cDNA synthesis kit was used to  
283 reverse transcribe total RNA and quantitative PCR was performed with SYBR Green® reagents  
284 (ThermoFisher). Pre-validated primer sequences were obtained from mouse primer depot  
285 (<https://mouseprimerdepot.nci.nih.gov/>). All mRNA levels were normalized to RPL32. For RNA  
286 sequencing, diaphragm RNA was isolated with RNeasy Kit (Qiagen, #74104). RNA library  
287 construction and sequencing were performed by the High-Throughput Genomics Core at the  
288 Huntsman Cancer Institute/University of Utah. RNA libraries were constructed using the Illumina  
289 TruSeq Stranded Total RNA Sample Prep Kit and contaminating rRNAs were removed using  
290 RiboZero Gold. Sequencing was performed using a NovSeq2 with 25 million reads per sample.  
291 Pathway analyses were performed by the Bioinformatics Core at the Huntsman Cancer  
292 Institute/University of Utah using the KEGG Pathway database. For differentially-expressed  
293 genes, only transcripts with  $P_{adj} < 0.05$  and BaseMean > 100 are included. For pathway

294 analyses, the area-proportional Venn diagram was drawn with eulerAPE.<sup>44</sup> KEGG Pathways  
295 that were differentially expressed between control and PSD-MKO diaphragms were stratified to  
296 those that were or were not rescued by mCAT overexpression.

297

#### 298 *Mitochondrial isolation*

299 Tissues were minced in ice cold MIM buffer (300 mM Sucrose, 10 mM HEPES, 1 mM EGTA, 1  
300 mg/ml BSA, pH 7.4) and gently homogenized with a Teflon pestle. The homogenate was  
301 centrifuged at 800 x g for 10 min at 4°C. The supernatant was transferred to another tube and  
302 centrifuged again at 12,000 x g for 10 min at 4°C. The crude mitochondrial pellet was  
303 suspended in 15% Percoll (diluted with MIM buffer) and a discontinuous Percoll gradient was  
304 prepared consisting of 50%, 22%, and 15% Percoll layers. Mitochondria were carefully layered  
305 on top of the gradient and spun at 22,700 RPM for 10 min at 4°C in an ultracentrifuge (Thermo  
306 Scientific SureSpin 630 rotor). The purified mitochondrial fraction was collected at the 50% -  
307 22% Percoll interface. To remove excess Percoll, the collected mitochondrial fraction was  
308 diluted with MIM and spun for 3 min at 10,000 x g. This step was repeated twice and the final  
309 mitochondrial pellet was suspended in MIM buffer for experiments.

310

#### 311 *Lipid extraction, thin layer chromatography, and lipid mass spectrometry*

312 Mitochondrial lipids were extracted using a modified Bligh-Dyer extraction. Resuspended lipids  
313 were then used for phospholipid quantification by thin layer chromatography or mass  
314 spectrometry. The TLC plates were developed using chloroform:glacial acetic  
315 acid:methanol:water (65:35:5:2) as mobile phase for PC and PS, and chloroform:glacial acetic  
316 acid:methanol:water (85:25:5:2) as mobile phase for PE, CL, and PI. The plates were dried,  
317 sprayed with charring solution, and heated at 190 °C for ~15 min. Intensity of the charred lipid  
318 spots was measured using an Odyssey Infrared Imager. Mass spectrometry analyses of  
319 phospholipids for exercise training, disuse, and PSD-MKI samples were performed at the

320 University of Utah Metabolomics Core, with untargeted (Agilent 6530 UPLC-QToF mass  
321 spectrometer) and targeted (UPLC-QQQ mass spectrometer) platforms. Mass spectrometric  
322 analyses of HCR/LCR and PSD-MKO samples were performed at the University of Michigan  
323 Nutrition and Obesity Research Center Metabolomics Core using a ABSCIEX 5600 TripleTOF  
324 mass spectrometer. For untargeted comprehensive lipidomics (exercise training, HCR/LCR,  
325 disuse), quantities are expressed as z-scores.

326

### 327 *Cell culture*

328 C2C12 myoblasts were grown and maintained in high glucose DMEM + 10% fetal bovine serum  
329 (FBS) + 100 µg/ml of penicillin/streptomycin. Once 90-100% confluent, C2C12 myoblasts were  
330 differentiated into myotubes using low glucose DMEM (1 g/L glucose, L-glutamine, 110 mg/L  
331 sodium pyruvate) + 2% horse serum + 100 µg/ml of penicillin/streptomycin. HEK 293T cells  
332 were maintained in high glucose DMEM + 10% FBS + 100 µg/ml of penicillin/streptomycin. The  
333 overexpression or lentivirus-mediated knockdown of PSD was performed as previously  
334 described<sup>45</sup>. Vectors were sourced from OriGene (Rockville, MD) for PISD-expressing plasmid  
335 (MR206380), Sigma (St. Louis, MO) for shRNA for mouse PISD (shPSD: TRCN0000115415,  
336 and Addgene (Cambridge, MA) for psPAX2 (ID #12260), pMD2.G (ID #12259), and scrambled  
337 shRNA plasmid (SC: ID #1864).

338

### 339 *Mitochondrial respiration measurements*

340 Respiration in permeabilized muscle fiber bundles and isolated mitochondria was performed as  
341 previously described.<sup>46,47</sup> Briefly, a small portion of freshly dissected red gastrocnemius muscle  
342 tissue was placed in Buffer X (7.23 mM K<sub>2</sub>EGTA, 2.77 mM Ca K<sub>2</sub>EGTA, 20 mM imidazole,  
343 20 mM taurine, 5.7 mM ATP, 14.3 mM phosphocreatine, 6.56 mM MgCl<sub>2</sub>·6H<sub>2</sub>O, and 50 mM K-  
344 MES, pH = 7.1), Fiber bundles were separated and permeabilized for 30 min at 4°C with  
345 saponin (30 µg/ml) and immediately washed in Buffer Z (105 mM K-MES, 30 mM KCl, 10 mM

346  $K_2HPO_4$ , 5 mM  $MgCl_2 \cdot 6H_2O$ , 0.5 mg/ml BSA, and 1 mM EGTA, pH = 7.4) for 15 min. After  
347 washing, high-resolution respiration rates were measured using an OROBOROS Oxygraph-2k.  
348 The muscle fibers were suspended in Buffer Z with 20 mM creatine and 10  $\mu$ M blebbistatin to  
349 inhibit myosin ATPases during respiration measurements. A variety of respiration protocols  
350 were utilized in permeabilized fibers and isolated mitochondria. For the mixed substrate  
351 protocol, the chamber was hyperoxygenated to ~300 pmol and started with the addition of  
352 malate (0.5 mM) followed by sequential additions of pyruvate (5 mM), ADP (2 mM), succinate  
353 (10 mM), cytochrome c (10  $\mu$ M), rotenone (5  $\mu$ M), malonate (5mM), duroquinol (0.25 mM), and  
354 antimycin A (2  $\mu$ M). For the fatty acid oxidation protocol, the chamber was not hyperoxygenated  
355 and the protocol started with the addition of malate (0.5 mM) followed by sequential additions of  
356 palmitoyl-I-carnitine (50  $\mu$ M) and ADP (2 mM). For Complex IV mediated respiration, rotenone  
357 (5  $\mu$ M), malonate (5mM), and antimycin A (2  $\mu$ M) were added to inhibit Complexes I-III, after  
358 which ascorbate (2mM, prevents autooxidation of TMPD), TMPD (0.5 mM), and KCN (20 mM)  
359 were sequentially added. When respiration experiments were complete, fiber bundles were  
360 washed in distilled  $H_2O$  to remove salts, then freeze dried in a lyophilizer (Lab-Conco). Dry  
361 weight was measured and respiration rate was expressed relative to fiber weight. When isolated  
362 mitochondria respiration rates were measured, the respiration rate was normalized to the total  
363 protein content in the chamber.

364 Oxygen consumption rates in C2C12 cells were measured with a Seahorse Flux  
365 Analyzer XF24 or XFe96 (Seahorse Bioscience, Billerica, MA). The cells were plated at  
366 ~20,000-40,000 cells/well and then differentiated into myotubes. On the day of the experiment,  
367 medium was switched to XF Assay Medium Modified DMEM (pH = 7.4) containing added  
368 glucose (10 mM), pyruvate (200 mM), and glutamine (200 mM) for 1 h. Subsequently, basal and  
369 maximal respiration rates were measured as previously described.<sup>46</sup>

370

371 *H<sub>2</sub>O<sub>2</sub> emission and production*



372 The Amplex Ultra Red (10  $\mu$ M) / horseradish peroxidase (3 U/ml) detection system was used to  
373 measure mitochondrial H<sub>2</sub>O<sub>2</sub> emission and production fluorometrically (Ex:Em 565:600,  
374 HORIBA Jobin Yvon Fluorolog) at 37°C.<sup>47</sup> Permeabilized muscle fibers were placed into a glass  
375 cuvette with Amplex Ultra Red reagents and buffer Z (with 1 mM EGTA and 23 U superoxide  
376 dismutase). Initially, an 8-min background rate was obtained, followed by addition of palmitoyl-L-  
377 carnitine / malate (50  $\mu$ M / 1 mM) into the cuvette for measurement of H<sub>2</sub>O<sub>2</sub> emission rate. For  
378 maximal H<sub>2</sub>O<sub>2</sub> production rate, auranofin (1  $\mu$ M) and carmustine (BCNU, 100  $\mu$ M) were titrated  
379 into the cuvette to inhibit thioredoxin reductase and glutathione reductase, respectively. The  
380 fiber bundles were washed in distilled H<sub>2</sub>O, freeze dried, and dry weight was measured. H<sub>2</sub>O<sub>2</sub>  
381 rates were expressed relative to fiber weight. Rates were then corrected for O<sub>2</sub> consumption,  
382 which was measured with an Oxygraph-2k machine in the presence of identical substrates.

383

#### 384 *Western blotting*

385 Tissues or cells were homogenized in lysis buffer, nutated at 4°C for 1 h, centrifuged at 4°C for  
386 15 min at 12,000 x g, and the supernatant was transferred to a new tube. Western blotting was  
387 performed as previously described (10) and samples were analyzed for protein abundance of  
388 FoxO1 (Cell Signaling, #2880), 4-HNE (Abcam, ab48506), DRP-1 (Abcam, ab56788), pDRP-1  
389 (Cell Signaling, #3455), Mfn-2 (Abcam, ab56889), Nrf2 (DSHB), FoxO3 (DSHB), PRDX4  
390 (DSHB), Citrate Synthase (Abcam, ab96600), and catalase (Abcam, ab1877).

391

#### 392 *Specific activity of mitochondrial enzymes*

393 The specific activities of electron transport chain enzymes were determined using  
394 spectrophotometric methods. Briefly, myoblasts or isolated mitochondria were freeze thawed 2-  
395 3 times to disrupt the outer mitochondrial membrane and allow access of substrates to  
396 enzymes. The specific activity of each complex was measured at 37°C using reagents and  
397 substrates specified previously.<sup>48</sup> For experiments involving C2C12 cells, Complexes I and V

398 activities were measured in isolated mitochondria, whereas activities of other Complexes were  
399 measured in whole cells. Citrate synthase activity was measured on a 96-well plate using a  
400 commercially available kit (Sigma Aldrich, CS0720).

401

#### 402 *Blue native PAGE*

403 Isolated mitochondria suspended in MIM were solubilized (0.5-2 mg) in 2% digitonin for 15 min  
404 on ice and then centrifuged at 20,000 x g for 30 min at 4°C. The supernatant was collected and  
405 placed into a new tube, and protein content was measured. Approximately 25-35 µg of  
406 mitochondrial protein was suspended in a mix of native PAGE 5% G-250 sample buffer and 1X  
407 native-PAGE sample buffer (total volume of 10-20 µl). The samples and standards were then  
408 loaded onto a native PAGE 3-12% Bis-Tris Gel (ThermoFisher, BN1001BOX) and  
409 electrophoresis performed at 150 V for 3 h on ice. The gel was then placed in fixative solution  
410 (40% methanol, 10% acetic acid), microwaved on high for 45 s, and then shaken on an orbital  
411 shaker for 15 min at room temperature. After incubation, the gel was placed in destaining  
412 solution (8% acetic acid), microwaved on high for 45 s, then incubated overnight at 4°C on an  
413 orbital shaker. The gel was scanned for densitometry.

414

#### 415 *Glutathione protein abundance*

416 Protein levels of reduced glutathione (GSH) and oxidized glutathione disulfide (GSSG) were  
417 measured using high-performance liquid chromatography (Shimadzu Prominence HPLC  
418 system). Freshly dissected gastrocnemius muscle was hand homogenized with a glass pestle in  
419 buffer containing 50 mmol/L Trizma base, 20 mmol/L boric acid, 20 mmol/L L-serine, and 10  
420 mmol/L N-ethylmaleimide. The homogenate was then frozen until processing, in which the  
421 sample was split into two parts for detection of GSH and GSSG. For GSH measurement the  
422 homogenate was deproteinated with 1:10 (v/v) 15% trichloroacetic acid, centrifuged for 5 min at  
423 20,000 x g, and the supernatant was transferred to an autosampler vial for measurement of

424 GSH by high-performance liquid chromatography using 92.5% of a 0.25% (v/v) glacial acetic  
425 acid mixed with 7.5% pure HPLC-grade acetonitrile. Ultraviolet chromatography was used to  
426 measure the GSH–NEM conjugate at a wavelength of 265 nmol/L (SPD-20A; Shimadzu).

427

#### 428 *Malondialdehyde (MDA) quantification*

429 MDA content was quantified in fresh gastrocnemius muscles using a lipid peroxidation assay kit  
430 (Abcam, ab118970) according to manufacturer's instruction. Rates of appearance of MDA-  
431 thiobarbituric acid (TBA) adduct were quantified colorimetrically at 532 nm using a  
432 spectrophotometer.

433

#### 434 *Bone density, body composition, and indirect calorimetry*

435 Bone density of the femur was determined using microcomputed tomography ( $\mu$ CT, Scanco  
436 Medical AG). Fat and lean body mass were measured using the EchoMRI-500 (EchoMRI,  
437 Houston, TX). Whole body oxygen consumption, respiratory exchange ratio, and physical  
438 activity levels were determined using a TSE LabMaster System (TSE Systems, Chesterfield,  
439 MO). Measurements were taken over a 4-5 d period, with the first 1-2 d of data excluded for  
440 acclimitization to the new environment. Data represent averages of two or three 12-h light or  
441 dark cycles.

442

#### 443 *Echocardiography*

444 Echocardiographic measurements were made as previously described.<sup>47</sup> Briefly, mice were  
445 anesthetized with a 0.5-2% isoflurane in an oxygen mixture and kept on a heated monitoring  
446 plate to maintain body temperature. Heart rate was kept between 400-500 bpm for all  
447 measurements to ensure physiological relevance. The Vevo 2100™ High-Resolution In Vivo  
448 Imaging System (VisualSonics) was used with a 30-MHz transducer for echocardiographic  
449 recordings. B-mode recordings from transthoracic long-axis view were used to measure left

450 ventricular volume during diastole and systole. These measurements were used to calculate  
451 ejection fraction, stroke volume, and cardiac output.

452

#### 453 *Electron microscopy*

454 Freshly dissected skeletal muscle was immediately placed in a 2% glutaraldehyde and 0.1 M  
455 cacodylate fixation mix and cut into longitudinal sections ~2 mm in diameter and ~3-4 mm in  
456 length. Tissues were stored in fixation mixture at 4°C until all tissues were collected. The tissues  
457 were washed three times for 10 min in 0.1 M phosphate buffer, fixed in 1% osmium tetroxide for  
458 1 h, then washed three times for 10 min in 0.1 M phosphate buffer. The fixed tissues were  
459 dehydrated in sequential steps of 25%, 50%, 75%, and 100% alcohol (twice each step) for 15  
460 min each. The tissue was then embedded in increasing concentrations of Spurr's media  
461 including 30% (for 30 min), 70% (overnight), 100% (2 h), and 100% (30 min). Each tissue was  
462 placed in a flat-bottom embedding mold filled 50% with Spurr's medium, then polymerized at  
463 ~60°C overnight. The tissues were then cut through the transverse plane and imaged with a  
464 JEOL 1200EX transmission electron microscope equipped with a Soft Imaging Systems  
465 MegaView III CCD camera.

466

#### 467 *Muscle strength experiments*

468 The extensor digitorum longus (EDL) and diaphragm muscles were dissected as previously  
469 described<sup>49</sup> and tied into the Horizontal Tissue Bath System from Aurora Scientific, Inc (Model:  
470 801C). Muscles were stimulated with a 20V twitch train and stretched until optimal length for  
471 force production was reached. After a 5 min equilibration period, muscles were stimulated with  
472 frequencies ranging from 10-200 Hz (0.1 ms pulse, 330 ms train, 2 min between trains). Forces  
473 produced by electrically-stimulated muscle contractions were recorded in real time via a force  
474 transducer (Aurora Scientific Inc., Model: 400A). Specific force was calculated using cross

475 sectional area of the muscle tissue ( $\text{mN}/\text{mm}^2$ ), as estimated from the weight and length of the  
476 muscle.

477

#### 478 *Histology*

479 Frozen muscle or lung tissues were embedded in optimal cutting temperature (OCT) compound  
480 and were sectioned ( $10\mu\text{m}$ ) with a cryostat (Microtome Plus). Muscle sections were used for  
481 myosin heavy chain (MHC) isoform immunofluorescence (IF) and Sirius Red staining to  
482 examine fibrosis. For MHC IF, sections were incubated with MHC I (BA.D5), MHC IIa (SC.71),  
483 MHC IIb (BF.F3, all three from Developmental Studies Hybridoma Bank, University of Iowa), or  
484 laminin (Sigma, #L9393) and imaged at the University of Utah Cell Imaging Core. Negative-  
485 stained fibers were considered to be MHC IIx. Master Tech Picro Sirius Red was used for Sirius  
486 Red staining. Myofiber cross-sectional area was quantified using semi-automatic muscle  
487 analysis using segmentation of histology: a MATLAB application (SMASH) alongside ImageJ  
488 software. Lung tissues were used for H&E staining.

489

#### 490 *Statistical Analyses*

491 Data are presented as means  $\pm$ SEM. Statistical analyses were performed using GraphPad  
492 Prism 7.03 software. Independent samples t-tests were used to compare two groups. For two-  
493 by-two comparisons, two-way ANOVA analyses were performed (main effect of genotype  
494 shown over a horizontal line) followed by appropriate post-hoc tests corrected for multiple  
495 comparisons. All tests were two-sided and  $p < 0.05$  was considered statistically significant.

496

497

498 **Acknowledgements:**

499 This work was supported by NIH grants DK107397, DK109888, DK095774 (to K.F.), DK110656  
500 (to P.D.N.), AG050781 (to M.J.D.), HL123647, AT008375 (to S.R.S.), HL129632 (T.E.R.), and  
501 DK109556 (to T.D.H.), Larry H. & Gail Miller Foundation grant (to P.J.F.), and American Heart  
502 Association grants 19PRE34380991 (to J.M.J), 18PRE33960491 (to A.R.P.V.), and  
503 16POST30980047 (to T.D.H.). University of Utah Metabolomics Core Facility is supported by  
504 S10 OD016232, S10 OD021505, and U54 DK110858. Mouse lines are available from K.F. upon  
505 request.

506

507 **Competing Interests:**

508 None to disclose.

509 **References**

- 510 1 Myers, J. *et al.* Exercise capacity and mortality among men referred for exercise testing.  
511 *The New England journal of medicine* **346**, 793-801, doi:10.1056/NEJMoa011858  
512 (2002).
- 513 2 Bassett, D. R., Jr. & Howley, E. T. Limiting factors for maximum oxygen uptake and  
514 determinants of endurance performance. *Med Sci Sports Exerc* **32**, 70-84 (2000).
- 515 3 Holloszy, J. O. Biochemical adaptations in muscle. Effects of exercise on mitochondrial  
516 oxygen uptake and respiratory enzyme activity in skeletal muscle. *The Journal of*  
517 *biological chemistry* **242**, 2278-2282 (1967).
- 518 4 Henriksson, J. & Reitman, J. S. Time course of changes in human skeletal muscle  
519 succinate dehydrogenase and cytochrome oxidase activities and maximal oxygen  
520 uptake with physical activity and inactivity. *Acta physiologica Scandinavica* **99**, 91-97,  
521 doi:10.1111/j.1748-1716.1977.tb10356.x (1977).
- 522 5 Lin, J. *et al.* Transcriptional co-activator PGC-1 alpha drives the formation of slow-twitch  
523 muscle fibres. *Nature* **418**, 797-801, doi:10.1038/nature00904 (2002).
- 524 6 Larsson, N. G. *et al.* Mitochondrial transcription factor A is necessary for mtDNA  
525 maintenance and embryogenesis in mice. *Nature genetics* **18**, 231-236,  
526 doi:10.1038/ng0398-231 (1998).
- 527 7 van Meer, G., Voelker, D. R. & Feigenson, G. W. Membrane lipids: where they are and  
528 how they behave. *Nature reviews. Molecular cell biology* **9**, 112-124,  
529 doi:10.1038/nrm2330 (2008).
- 530 8 Heden, T. D., Neuffer, P. D. & Funai, K. Looking Beyond Structure: Membrane  
531 Phospholipids of Skeletal Muscle Mitochondria. *Trends in endocrinology and*  
532 *metabolism: TEM* **27**, 553-562, doi:10.1016/j.tem.2016.05.007 (2016).
- 533 9 Mejia, E. M. & Hatch, G. M. Mitochondrial phospholipids: role in mitochondrial function.  
534 *Journal of bioenergetics and biomembranes* **48**, 99-112, doi:10.1007/s10863-015-9601-  
535 4 (2016).
- 536 10 Ikon, N. & Ryan, R. O. Cardiolipin and mitochondrial cristae organization. *Biochimica et*  
537 *biophysica acta. Biomembranes* **1859**, 1156-1163, doi:10.1016/j.bbamem.2017.03.013  
538 (2017).
- 539 11 Pennington, E. R., Funai, K., Brown, D. A. & Shaikh, S. R. The role of cardiolipin  
540 concentration and acyl chain composition on mitochondrial inner membrane molecular  
541 organization and function. *Biochimica et Biophysica Acta (BBA) - Molecular and Cell*  
542 *Biology of Lipids*, doi:https://doi.org/10.1016/j.bbalip.2019.03.012 (2019).
- 543 12 Zhao, T. *et al.* PISD is a mitochondrial disease gene causing skeletal dysplasia,  
544 cataracts, and white matter changes. *Life science alliance* **2**,  
545 doi:10.26508/lsa.201900353 (2019).
- 546 13 Barth, P. G. *et al.* An X-linked mitochondrial disease affecting cardiac muscle, skeletal  
547 muscle and neutrophil leucocytes. *Journal of the neurological sciences* **62**, 327-355  
548 (1983).
- 549 14 Girisha, K. M. *et al.* The homozygous variant c.797G>A/p.(Cys266Tyr) in PISD is  
550 associated with a Spondyloepimetaphyseal dysplasia with large epiphyses and disturbed  
551 mitochondrial function. *Human mutation* **40**, 299-309, doi:10.1002/humu.23693 (2019).
- 552 15 Wisloff, U. *et al.* Cardiovascular risk factors emerge after artificial selection for low  
553 aerobic capacity. *Science* **307**, 418-420, doi:10.1126/science.1108177 (2005).
- 554 16 Zborowski, J., Dygas, A. & Wojtczak, L. Phosphatidylserine decarboxylase is located on  
555 the external side of the inner mitochondrial membrane. *FEBS Lett* **157**, 179-182 (1983).
- 556 17 Shiao, Y. J., Lupo, G. & Vance, J. E. Evidence that phosphatidylserine is imported into  
557 mitochondria via a mitochondria-associated membrane and that the majority of



- 558 mitochondrial phosphatidylethanolamine is derived from decarboxylation of  
559 phosphatidylserine. *The Journal of biological chemistry* **270**, 11190-11198 (1995).
- 560 18 Ren, Y. Y. *et al.* Selection-, age-, and exercise-dependence of skeletal muscle gene  
561 expression patterns in a rat model of metabolic fitness. *Physiological genomics* **48**, 816-  
562 825, doi:10.1152/physiolgenomics.00118.2015 (2016).
- 563 19 Kauffman, F. C. & Albuquerque, E. X. Effect of ischemia and denervation on metabolism  
564 of fast and slow mammalian skeletal muscle. *Experimental neurology* **28**, 46-63 (1970).
- 565 20 Sandri, M. *et al.* PGC-1 $\alpha$  protects skeletal muscle from atrophy by suppressing  
566 FoxO3 action and atrophy-specific gene transcription. *Proceedings of the National*  
567 *Academy of Sciences of the United States of America* **103**, 16260-16265,  
568 doi:10.1073/pnas.0607795103 (2006).
- 569 21 Kwon, O. S., Nelson, D. S., Barrows, K. M., O'Connell, R. M. & Drummond, M. J.  
570 Intramyocellular ceramides and skeletal muscle mitochondrial respiration are partially  
571 regulated by Toll-like receptor 4 during hindlimb unloading. *American journal of*  
572 *physiology. Regulatory, integrative and comparative physiology* **311**, R879-R887,  
573 doi:10.1152/ajpregu.00253.2016 (2016).
- 574 22 Steenbergen, R. *et al.* Disruption of the phosphatidylserine decarboxylase gene in mice  
575 causes embryonic lethality and mitochondrial defects. *The Journal of biological*  
576 *chemistry* **280**, 40032-40040, doi:10.1074/jbc.M506510200 (2005).
- 577 23 Barends, M. *et al.* Causes of Death in Adults with Mitochondrial Disease. *JIMD Rep* **26**,  
578 103-113, doi:10.1007/8904\_2015\_449 (2016).
- 579 24 Smuder, A. J. *et al.* Crosstalk between autophagy and oxidative stress regulates  
580 proteolysis in the diaphragm during mechanical ventilation. *Free Radic Biol Med* **115**,  
581 179-190, doi:10.1016/j.freeradbiomed.2017.11.025 (2018).
- 582 25 Tasseva, G. *et al.* Phosphatidylethanolamine deficiency in Mammalian mitochondria  
583 impairs oxidative phosphorylation and alters mitochondrial morphology. *The Journal of*  
584 *biological chemistry* **288**, 4158-4173, doi:10.1074/jbc.M112.434183 (2013).
- 585 26 Sharpley, M. S., Shannon, R. J., Draghi, F. & Hirst, J. Interactions between  
586 phospholipids and NADH:ubiquinone oxidoreductase (complex I) from bovine  
587 mitochondria. *Biochemistry* **45**, 241-248, doi:10.1021/bi051809x (2006).
- 588 27 Shinzawa-Itoh, K. *et al.* Structures and physiological roles of 13 integral lipids of bovine  
589 heart cytochrome c oxidase. *EMBO J* **26**, 1713-1725, doi:10.1038/sj.emboj.7601618  
590 (2007).
- 591 28 Sun, F. *et al.* Crystal structure of mitochondrial respiratory membrane protein complex II.  
592 *Cell* **121**, 1043-1057, doi:10.1016/j.cell.2005.05.025 (2005).
- 593 29 Nelson, B. D. & Fleischer, S. Phospholipid requirements for the reconstitution of  
594 complex-III vesicles exhibiting controlled electron transport. *Biochem J* **194**, 783-787  
595 (1981).
- 596 30 Acin-Perez, R., Fernandez-Silva, P., Peleato, M. L., Perez-Martos, A. & Enriquez, J. A.  
597 Respiratory active mitochondrial supercomplexes. *Mol Cell* **32**, 529-539,  
598 doi:10.1016/j.molcel.2008.10.021 (2008).
- 599 31 Letts, J. A. & Sazanov, L. A. Clarifying the supercomplex: the higher-order organization  
600 of the mitochondrial electron transport chain. *Nature structural & molecular biology* **24**,  
601 800-808, doi:10.1038/nsmb.3460 (2017).
- 602 32 Wong, H. S., Dighe, P. A., Mezera, V., Monternier, P. A. & Brand, M. D. Production of  
603 superoxide and hydrogen peroxide from specific mitochondrial sites under different  
604 bioenergetic conditions. *J Biol Chem* **292**, 16804-16809, doi:10.1074/jbc.R117.789271  
605 (2017).
- 606 33 Brand, M. D. Mitochondrial generation of superoxide and hydrogen peroxide as the  
607 source of mitochondrial redox signaling. *Free Radic Biol Med* **100**, 14-31,  
608 doi:10.1016/j.freeradbiomed.2016.04.001 (2016).



- 609 34 Anderson, E. J. *et al.* A carnosine analog mitigates metabolic disorders of obesity by  
610 reducing carbonyl stress. *The Journal of clinical investigation*, doi:10.1172/JC194307  
611 (2018).
- 612 35 Powers, S. K., Smuder, A. J. & Judge, A. R. Oxidative stress and disuse muscle atrophy:  
613 cause or consequence? *Current opinion in clinical nutrition and metabolic care* **15**, 240-  
614 245, doi:10.1097/MCO.0b013e328352b4c2 (2012).
- 615 36 Calvani, R. *et al.* Mitochondrial pathways in sarcopenia of aging and disuse muscle  
616 atrophy. *Biological chemistry* **394**, 393-414, doi:10.1515/hsz-2012-0247 (2013).
- 617 37 Hsu, J. L. *et al.* Catalytic properties of human manganese superoxide dismutase. *J Biol*  
618 *Chem* **271**, 17687-17691 (1996).
- 619 38 Pereira, B. *et al.* Superoxide dismutase, catalase, and glutathione peroxidase activities  
620 in muscle and lymphoid organs of sedentary and exercise-trained rats. *Physiology &*  
621 *behavior* **56**, 1095-1099 (1994).
- 622 39 Osman, C., Voelker, D. R. & Langer, T. Making heads or tails of phospholipids in  
623 mitochondria. *The Journal of cell biology* **192**, 7-16, doi:10.1083/jcb.201006159 (2011).
- 624 40 Calzada, E. *et al.* Phosphatidylethanolamine made in the inner mitochondrial membrane  
625 is essential for yeast cytochrome bc1 complex function. *Nature communications* **10**,  
626 1432, doi:10.1038/s41467-019-09425-1 (2019).
- 627 41 Funai, K. *et al.* Skeletal Muscle Phospholipid Metabolism Regulates Insulin Sensitivity  
628 and Contractile Function. *Diabetes* **65**, 358-370, doi:10.2337/db15-0659 (2016).
- 629 42 Selathurai, A. *et al.* The CDP-Ethanolamine Pathway Regulates Skeletal Muscle  
630 Diacylglycerol Content and Mitochondrial Biogenesis without Altering Insulin Sensitivity.  
631 *Cell metabolism* **21**, 718-730, doi:10.1016/j.cmet.2015.04.001 (2015).
- 632 43 van der Veen, J. N., Lingrell, S., da Silva, R. P., Jacobs, R. L. & Vance, D. E. The  
633 concentration of phosphatidylethanolamine in mitochondria can modulate ATP  
634 production and glucose metabolism in mice. *Diabetes* **63**, 2620-2630, doi:10.2337/db13-  
635 0993 (2014).
- 636 44 Micallef, L. & Rodgers, P. eulerAPE: drawing area-proportional 3-Venn diagrams using  
637 ellipses. *PloS one* **9**, e101717, doi:10.1371/journal.pone.0101717 (2014).
- 638 45 Paran, C. W. *et al.* Reduced efficiency of sarcolipin-dependent respiration in myocytes  
639 from humans with severe obesity. *Obesity* **23**, 1440-1449, doi:10.1002/oby.21123  
640 (2015).
- 641 46 Heden, T. D. *et al.* Greater Oxidative Capacity in Primary Myotubes from Endurance-  
642 trained Women. *Med Sci Sports Exerc* **49**, 2151-2157,  
643 doi:10.1249/MSS.0000000000001352 (2017).
- 644 47 Johnson, J. M. *et al.* Targeted overexpression of catalase to mitochondria does not  
645 prevent cardioskeletal myopathy in Barth syndrome. *Journal of molecular and cellular*  
646 *cardiology* **121**, 94-102, doi:10.1016/j.yjmcc.2018.07.001 (2018).
- 647 48 Sullivan, E. M. *et al.* Docosahexaenoic acid lowers cardiac mitochondrial enzyme activity  
648 by replacing linoleic acid in the phospholipidome. *J Biol Chem* **293**, 466-483,  
649 doi:10.1074/jbc.M117.812834 (2018).
- 650 49 Ferrara, P. J., Verkerke, A. R. P., Brault, J. J. & Funai, K. Hypothermia Decreases O<sub>2</sub>  
651 Cost for Ex Vivo Contraction in Mouse Skeletal Muscle. *Med Sci Sports Exerc* **50**, 2015-  
652 2023, doi:10.1249/MSS.0000000000001673 (2018).
- 653

**Figure 1**

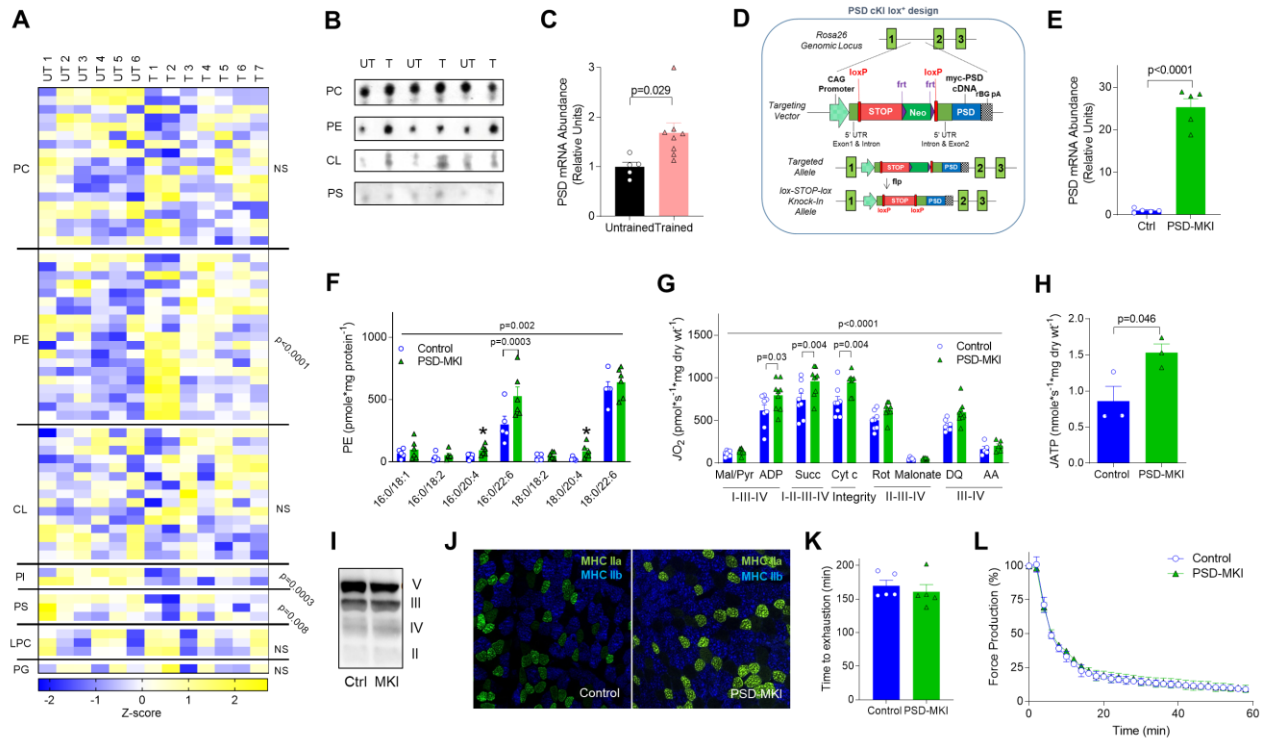

655

656 **Figure 1. Skeletal muscle mitochondrial PE promotes oxidative capacity.** (A-C) Untrained

657 (UT, n=6) or trained (T, n=7 or 8) C57BL6J mice. (A) Skeletal muscle mitochondrial

658 phospholipidome. (B) Mitochondrial phospholipids quantified by TLC. (C) Skeletal muscle PSD

659 mRNA. (D-L) Studies on PSD-MKI mice (n=3-9). (D) Generation of mice with conditional knock-

660 in of PSD. (E) Skeletal muscle PSD mRNA. (F) Muscle mitochondrial PE. (G, H) Rates for

661 oxygen consumption or ATP production in permeabilized muscle fibers with Krebs cycle

662 substrates. (I) Protein abundance of respiratory complex II-V. (J) Myosin-heavy chain fiber-type

663 distribution. (K) Endurance running test. (L) *Ex vivo* twitch endurance test. Mean ±SEM.

664

## Supplement Figure 1

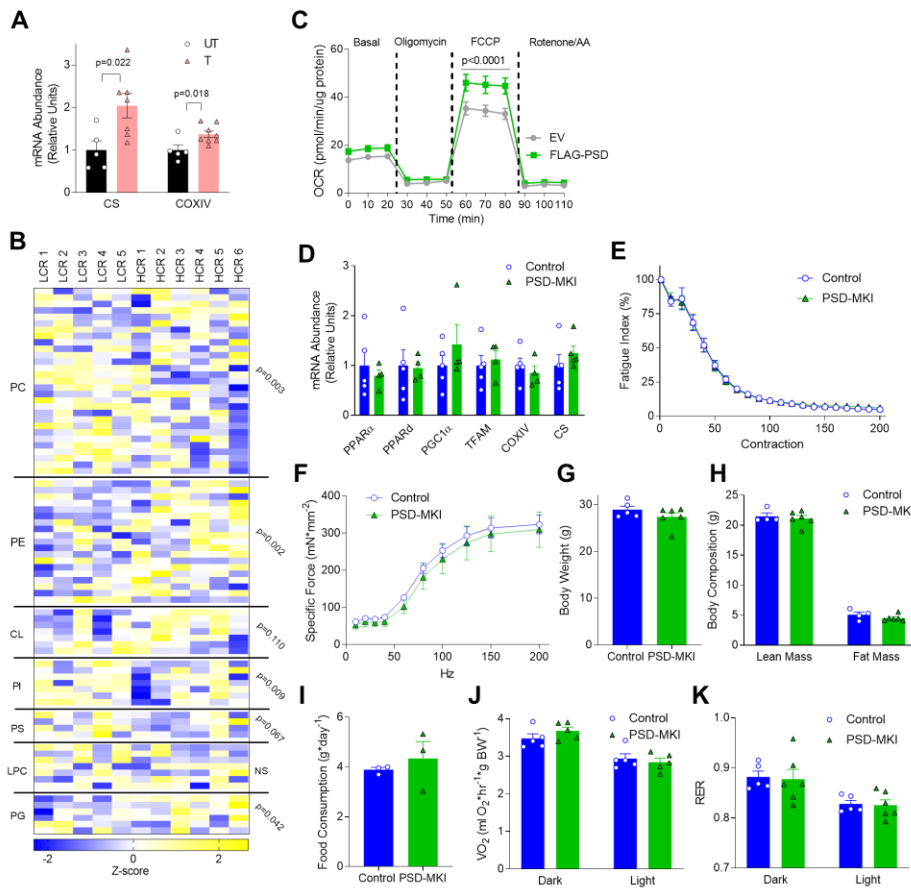

665

### 666 Supplement Figure 1. Skeletal muscle mitochondrial PE and oxidative capacity. (A)

667 Skeletal muscle citrate synthase (CS) and cytochrome oxidase IV (COXIV) mRNA in UT or T  
 668 mice (n=5-8). (B) Skeletal muscle mitochondrial phospholipidome in low-capacity running (LCR)  
 669 or high-capacity running (HCR) rats (n=5-6). (C) Oxygen consumption rates (OCR) from empty  
 670 vector (EV) or PSD-expression vector (FLAG-PSD) treated C2C12 myotubes (n=6). (D-K) Ctrl  
 671 or PSD-MKI mice. (D) Muscle mRNA encoding mitochondrial enzymes and transcription factors  
 672 (n=5). (E) Fatigue curve with tetanic contractions (n=5-6). (F) Force-frequency curve (n=3). (G)  
 673 Body weights (n=5-6). (H) Body composition (n=4-6). (I) Food consumption (n=3). (J) Whole-  
 674 body  $VO_2$  (n=5). (K) Respiratory exchange ratio (RER, n=5). Mean  $\pm$ SEM.

**Figure 2**

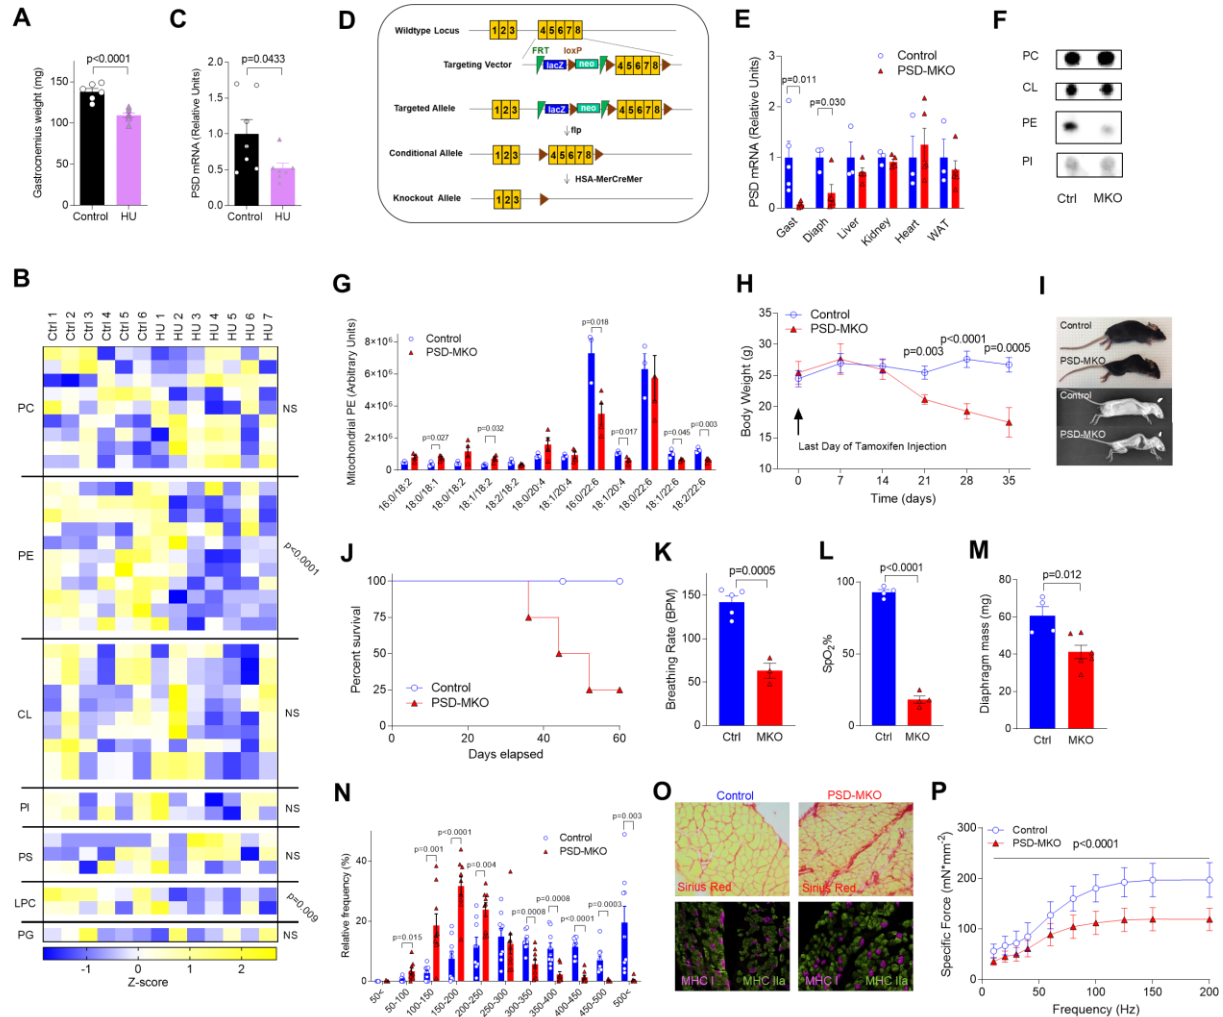

675

676 **Figure 2. Deficiency of mitochondrial PE promotes atrophy and respiratory failure. (A-C)**

677 Control (Ctrl, n=6 or 7) and hindlimb-unloaded (HU, n=7) C57BL6J mice. (A) Gastrocnemius

678 weight. (B) Skeletal muscle mitochondrial phospholipidome. (C) Skeletal muscle PSD mRNA.

679 (D-P) Studies on PSD-MKO mice. (D) Generation of PSD-MKO mice. (E) PSD mRNA levels in

680 multiple tissues (n=5-6). (F) TLC analysis of mitochondrial phospholipids. (G) Muscle

681 mitochondrial PE (n=3-4). (H) Body weights after tamoxifen injection (n=9-22). (I) Kyphosis in

682 PSD-MKO mice. (J) Kaplan-Meier survival curve. (K, L) Breathing rate and peripheral capillary

683 oxygen saturation (SpO<sub>2</sub>) 6-wk post-tamoxifen injection (n=3). (M-P) Diaphragm 4-wk post-

684 tamoxifen injection. (M) Diaphragm weight (n=4-6), (N) distribution of fiber cross-sectional area  
685 (n=9), (O) fibrosis and fiber-type, (P) force-frequency curve (n=4-6). Mean  $\pm$ SEM.

686

687

## Supplement Figure 2

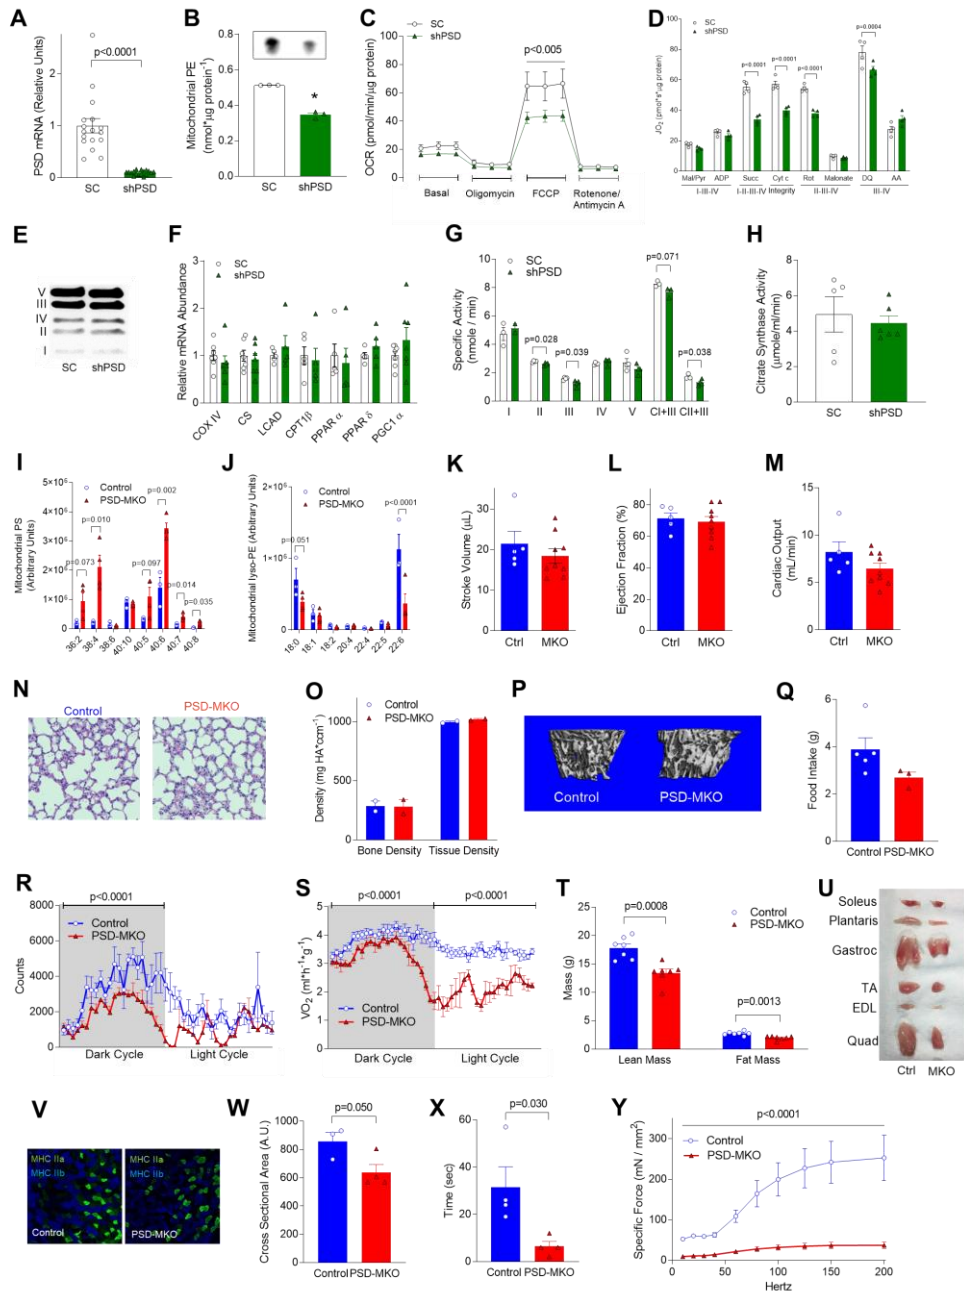

688

689 **Supplement Figure 2. Deficiency of muscle mitochondrial PE *in vitro* and *in vivo*. (A-H)**

690 C2C12 myotubes incubated with lentivirus expressing scrambled (SC) or shRNA targeted to

691 PSD (shPSD). (A) PSD mRNA (n=17). (B) Mitochondrial PE (n=3). (C) OCR in intact myotubes

692 (n=6). (D) Rate of oxygen consumption using Krebs cycle substrates (n=4). (E) Protein

693 abundance of respiratory complexes I-V. (F) mRNA encoding mitochondrial enzymes and  
694 transcription factors (n=4). (G) Activities of respiratory enzymes (n=3-4). (H) Citrate synthase  
695 activity (n=5-6). (I-Y). Studies on PSD-MKO mice. (I) Muscle mitochondrial lyso-PE (n=3-4). (J)  
696 Muscle mitochondrial PS (n=3-4). (K-M) Stroke volume, ejection fraction, or cardiac output  
697 measured with echocardiography (n=5-8). (N) H&E staining of lung section. (O, P) Bone density  
698 by  $\mu$ CT scan (n=2). (Q) Food intake (n=3-5). (R, S) Activity and  $VO_2$  measured by indirect  
699 calorimetry (n=6). (T) Body composition (n=7). (U) Muscle sizes. (V) Fiber-type composition.  
700 (W) Fiber cross-sectional area (n=3-4). (X) Kondziela's inverted screen test (n=4). (Y) Force-  
701 frequency curve of extensor digitorum longus muscles (n=2-4). Mean  $\pm$ SEM.

702



**Figure 3**

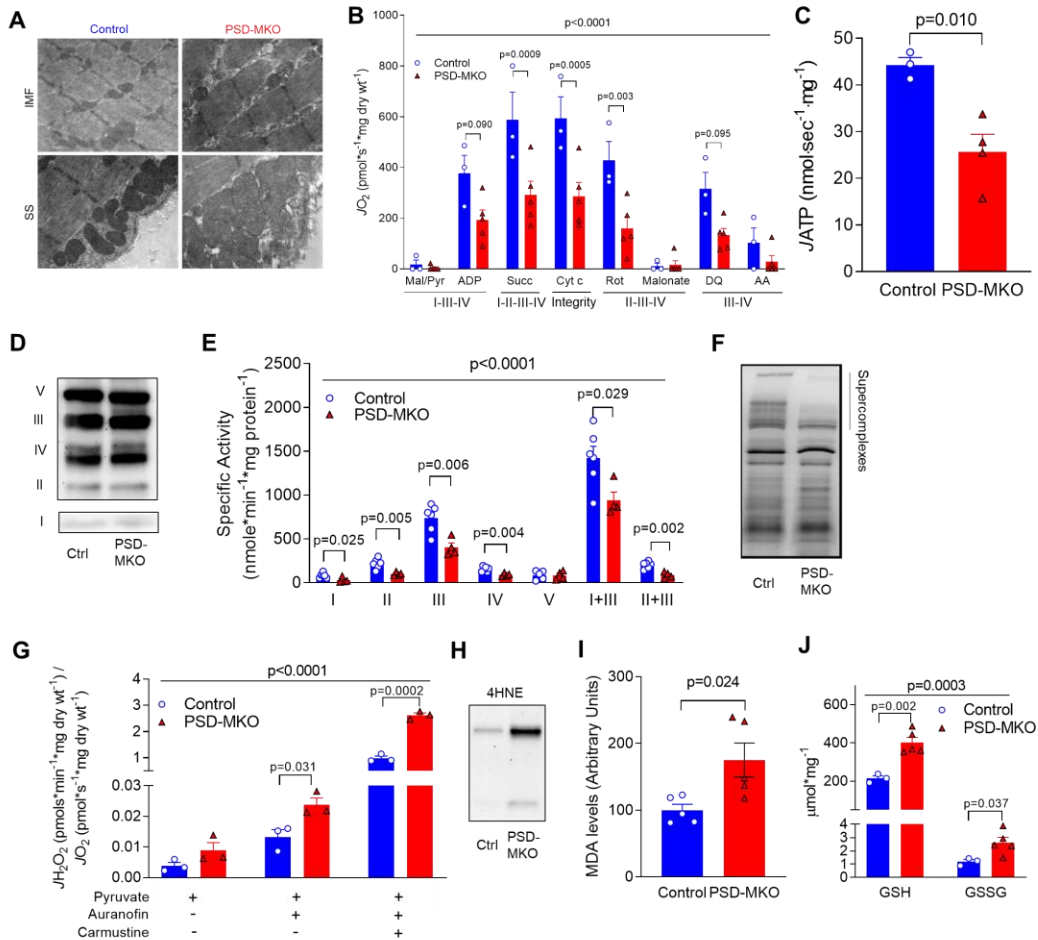

703

704 **Figure 3. PE deficiency in skeletal muscle mitochondria.** (A) Electron micrograph of  
 705 subsarcolemmal and intermyofibrillar mitochondria. (B, C) Rates of oxygen consumption and  
 706 ATP production in permeabilized fibers with Krebs cycle substrates (n=3-5). (D) Protein  
 707 abundance of respiratory complex I-V. (E) Activities of respiratory enzymes (n=4-6). (F) Blue  
 708 native gel of isolated mitochondria revealing supercomplexes. (G) Mitochondrial H<sub>2</sub>O<sub>2</sub>  
 709 production and emission with pyruvate (n=8-9). (H) 4-hydroxy-2-nonenal (4-HNE). (I)  
 710 malondialdehyde (MDA, n=5). (J) Reduced glutathione (GSH) and oxidized glutathione (GSSG)  
 711 (n=3-5). Mean ±SEM.

712



### Supplement Figure 3

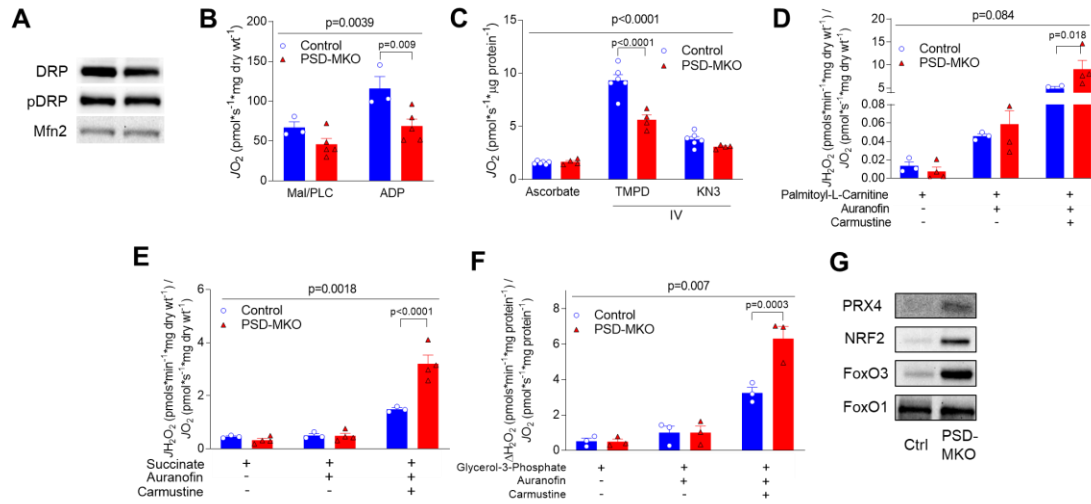

713

714 **Supplement Figure 3. PE deficiency in skeletal muscle mitochondria.** (A) Total and  
 715 phosphorylated (Ser 616) dynamin-related protein (DRP) and mitofusion 2. (B) Palmitoyl-L-  
 716 carnitine (PLC)-induced oxygen consumption in permeabilized fibers (n=3-5). (C) Complex IV-  
 717 mediated respiration rates in isolated mitochondria (n=4-6). (D-F) Mitochondrial H<sub>2</sub>O<sub>2</sub> production  
 718 and emission with palmitoyl-L-carnitine, succinate, or glycerol-3-phosphate (n=3-4). (G) Protein  
 719 abundance of the antioxidant enzyme peroxiredoxin 4 (PRX4) and regulators of antioxidant  
 720 defense including nuclear factor erythroid 2-related factor 2 (NRF2), Forkhead box protein O1  
 721 (FoxO1), and FoxO3. Mean ±SEM.

722

**Figure 4**

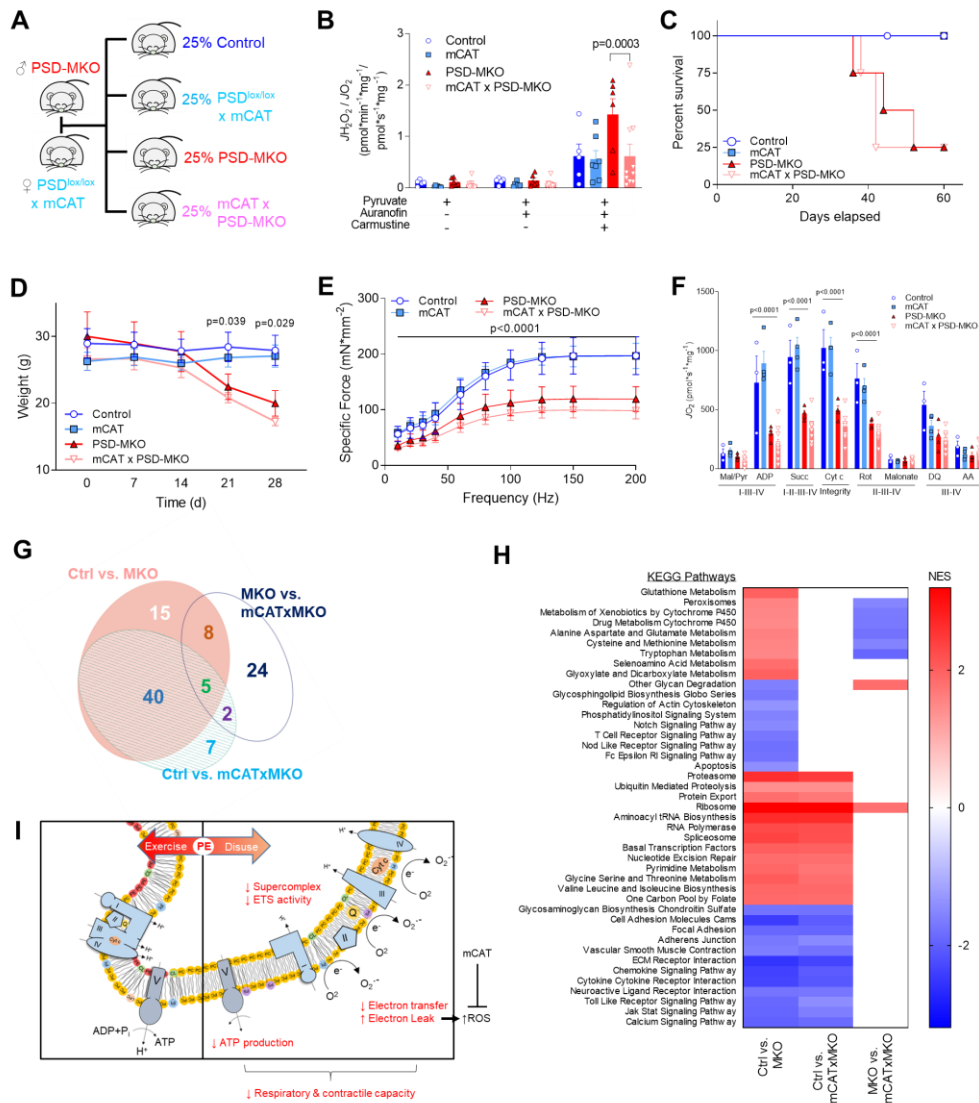

723

724 **Figure 4. Overexpression of mitochondrial catalase does not rescue PSD deficiency. (A)**

725 PSD-MKO mice were crossed with mCAT transgenic mice to generate mCAT x PSD-MKO

726 mice. (B) Mitochondrial H<sub>2</sub>O<sub>2</sub> production and emission with pyruvate (n=5-7). (C) Kaplan-Meier

727 survival curve. (D) Body weights after tamoxifen injection (n=6-9). (E) Force-frequency curve of

728 diaphragm muscles (n=4-11). (F) Rates of oxygen consumption in permeabilized fibers with

729 Krebs cycle substrates (n=4-10). (G, H) Pathway analyses for differentially-expressed genes

730 between control, PSD-MKO, and mCATxPSD-MKO diaphragms (n=3-4). (G) Area-proportional

731 Venn diagram of differentially-activated pathways. (H) Normalized enrichment scores (NES) of  
732 differentially-activated pathways. (I) Schematic illustration of the consequences of mitochondrial  
733 PE deficiency. Mean  $\pm$ SEM.  
734

Supplement Figure 4

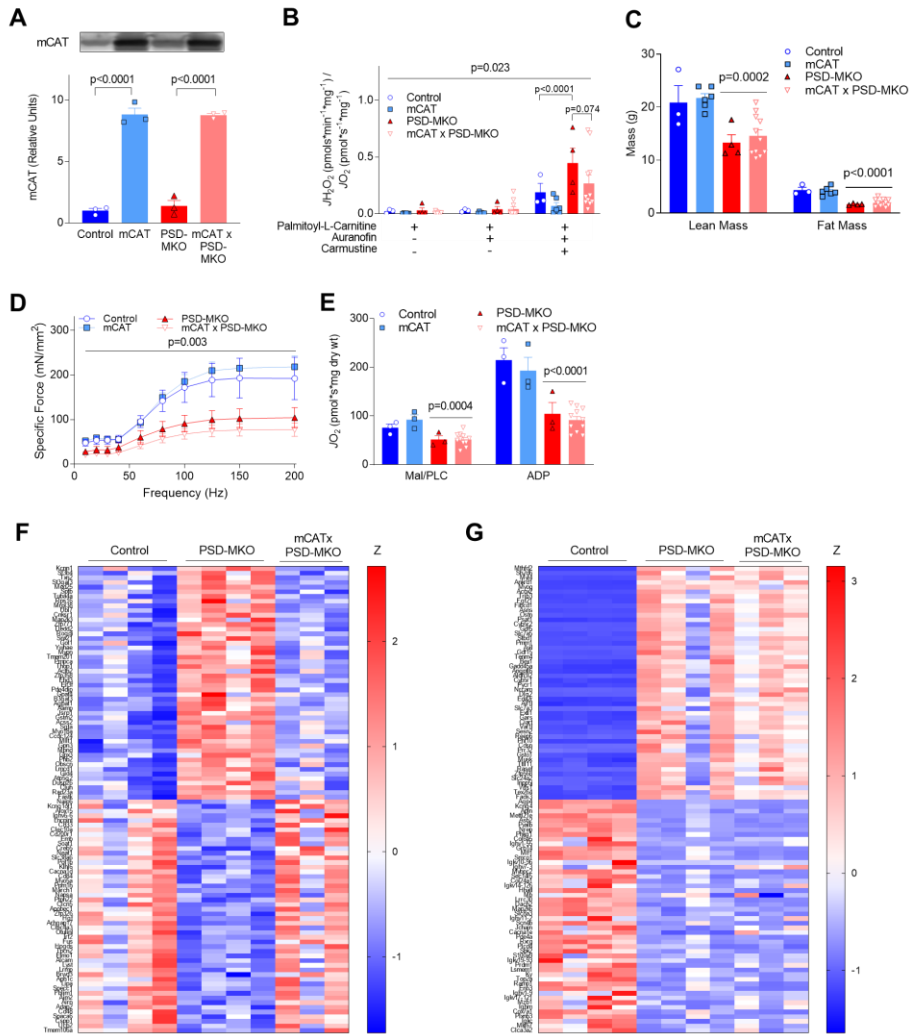

735

736 **Supplement Figure 4. Overexpression of mitochondrial catalase does not rescue muscle-**

737 **specific PSD deficiency.** (A) Protein abundance of mCAT (n=3). (B) Mitochondrial  $\text{H}_2\text{O}_2$

738 production and emission with palmitoyl-L-carnitine (n=3-11). (C) Body composition of mice 4-wk

739 post-tamoxifen injection (n=3-11). (D) Force frequency curve for extensor digitorum longus

740 (n=3-11). (E) Palmitoyl-L-carnitine (PLC)-induced oxygen consumption in permeabilized fibers

741 (n=3-11). (F) Heatmap of top 100 (50 high and 50 low) genes that were differentially expressed

742 between control and PSD-MKO diaphragms that were reversed in mCATxPSD-MKO

743 diaphragms. Z: z-score. (n=3-4). (G) Heatmap of top 100 (50 high and 50 low) genes that were  
744 differentially expressed between control and PSD-MKO diaphragms. Mean  $\pm$ SEM.
